# Supplementary material
Source: publisher site journal article supplement (https://www.dovepress.com/article/188661)
Supplement: Supplementary file 1 [file get_supplementary_file.php]

# Supplementary materials

## Oncometabolomics and thyroid cancer

### MESH Terms and Emtree

- Metabolomic
- Metabonomics
- Metabolomes
- Metabolic Profile
- Metabolic Profiles
- Profile, Metabolic
- Profiles, Metabolic
- Neoplasm, Thyroid
- Thyroid Neoplasm
- Thyroid Carcinoma
- Carcinoma, Thyroid
- Thyroid Carcinomas
- Cancer of Thyroid
- Thyroid Cancers
- Cancer, Thyroid
- Cancer of the Thyroid
- Thyroid Adenoma
- Adenoma, Thyroid
- Adenomas, Thyroid

### PUBMED Search History

| Recent queries |                     |                                                                                                                                                                                                                       |                          |          |
|----------------|---------------------|-----------------------------------------------------------------------------------------------------------------------------------------------------------------------------------------------------------------------|--------------------------|----------|
| Search         | Add to builder      | Query                                                                                                                                                                                                                 | Items found              | Time     |
| #20            | <a href="#">Add</a> | Search (((("metabolome"[Title/Abstract]) OR "metabonome"[Title/Abstract]) OR "metabolomics"[Title/Abstract]) AND "thyroid"[Title/Abstract]) AND ("1990/01/01"[Date - Publication] : "2018/02/30"[Date - Publication]) | <a href="#">52</a>       | 22:21:25 |
| #19            | <a href="#">Add</a> | Search (((("metabolome"[Title/Abstract]) OR "metabonome"[Title/Abstract]) OR "metabolomic"[Title/Abstract]) AND "thyroid"[Title/Abstract]) OR ("1990/01/01"[Date - Publication] : "2018/02/30"[Date - Publication])   | <a href="#">19155729</a> | 22:19:18 |
| #17            | <a href="#">Add</a> | Search (("metabolomic"[Title/Abstract]) AND "endocrine"[Title/Abstract]) AND ("1990/01/01"[Date - Publication] : "2018/02/30"[Date - Publication])                                                                    | <a href="#">61</a>       | 22:16:43 |
| #16            | <a href="#">Add</a> | Search (("oncometabolomics"[Title/Abstract]) AND "thyroid"[Title/Abstract]) AND ("1990/01/01"[Date - Publication] : "2018/02/30"[Date - Publication]) Schema: all                                                     | <a href="#">0</a>        | 22:15:01 |
| #15            | <a href="#">Add</a> | Search (("oncometabolomics"[Title/Abstract]) AND "thyroid"[Title/Abstract]) AND ("1990/01/01"[Date - Publication] : "2018/02/30"[Date - Publication])                                                                 | <a href="#">0</a>        | 22:15:01 |
| #13            | <a href="#">Add</a> | Search (("metabolic changes"[Title/Abstract]) AND "thyroid"[Title/Abstract]) AND ("1990/01/01"[Date - Publication] : "2018/02/30"[Date - Publication])                                                                | <a href="#">133</a>      | 22:12:41 |
| #11            | <a href="#">Add</a> | Search (("metabolomic"[Title/Abstract]) AND "thyroid"[Title/Abstract]) AND ("1990/01/01"[Date - Publication] : "2018/02/30"[Date - Publication])                                                                      | <a href="#">22</a>       | 22:10:30 |
| #10            | <a href="#">Add</a> | Search (("metabolites"[Title/Abstract]) AND "thyroid"[Title/Abstract]) AND ("1990/01/01"[Date - Publication] : "2018/02/30"[Date - Publication])                                                                      | <a href="#">728</a>      | 22:08:24 |
| #8             | <a href="#">Add</a> | Search (("omics"[Title/Abstract]) AND "thyroid"[Title/Abstract]) AND ("1990/01/01"[Date - Publication] : "2018/02/30"[Date - Publication])                                                                            | <a href="#">18</a>       | 22:06:30 |
| #7             | <a href="#">Add</a> | Search (("metabonomic"[Title/Abstract]) AND "thyroid"[Title/Abstract]) AND ("1990/01/01"[Date - Publication] : "2018/02/30"[Date - Publication])                                                                      | <a href="#">4</a>        | 22:04:19 |
| #5             | <a href="#">Add</a> | Search (("metabolome"[Title/Abstract]) AND Thyroid[Title/Abstract]) AND ("1990/01/01"[Date - Publication] : "2018/02/30"[Date - Publication])                                                                         | <a href="#">14</a>       | 21:58:42 |

| Recent queries |                |                                                                                                                                                                                                                                                                                                                                                                                                        |             |          |
|----------------|----------------|--------------------------------------------------------------------------------------------------------------------------------------------------------------------------------------------------------------------------------------------------------------------------------------------------------------------------------------------------------------------------------------------------------|-------------|----------|
| Search         | Add to builder | Query                                                                                                                                                                                                                                                                                                                                                                                                  | Items found | Time     |
|                |                | <b>Publication]</b>                                                                                                                                                                                                                                                                                                                                                                                    |             |          |
| #3             | Add            | Search (("metabolomics"[Title/Abstract]) AND "thyroid"[Title/Abstract]) AND ("1990/01/01"[Date - Publication] : "2018/02/30"[Date - Publication])                                                                                                                                                                                                                                                      | 47          | 21:53:18 |
| #2             | Add            | Search (((((((("metabolome"[Title/Abstract]) OR "metabolomics"[Title/Abstract]) OR "metabonomic"[Title/Abstract]) AND "thyroid"[Title/Abstract]) OR "thyroid cancer diagnosis"[Title/Abstract]) OR "thyroid carcinoma"[Title/Abstract]) OR "thyroid cancer"[Title/Abstract]) OR "thyroid adenoma/carcinoma"[Title/Abstract]) AND ("1990/01/01"[Date - Publication] : "2018/02/30"[Date - Publication]) | 27575       | 21:50:33 |

## Scopus Search History

|    |                                                                                                                                                                                       |                          |
|----|---------------------------------------------------------------------------------------------------------------------------------------------------------------------------------------|--------------------------|
| 18 | ( TITLE-ABS-KEY ( metabolomic ) AND TITLE-ABS-KEY ( thyroid ) OR TITLE-ABS-KEY ( endocrine ) OR TITLE-ABS-KEY ( "thyroid cancer" ) ) AND PUBYEAR > 1989                               | 183 document results     |
| 17 | ( TITLE-ABS-KEY ( metabonom ) AND TITLE-ABS-KEY ( thyroid ) OR TITLE-ABS-KEY ( endocrine ) OR TITLE-ABS-KEY ( "thyroid cancer" ) ) AND PUBYEAR > 1989                                 | 0 document results       |
| 15 | ( TITLE-ABS-KEY ( metabolome ) AND TITLE-ABS-KEY ( thyroid ) OR TITLE-ABS-KEY ( endocrine ) OR TITLE-ABS-KEY ( "thyroid cancer" ) ) AND PUBYEAR > 1989                                | 201 document results     |
| 14 | ( TITLE-ABS-KEY ( metabolome ) AND TITLE-ABS-KEY ( thyroid ) OR TITLE-ABS-KEY ( endocrine ) OR TITLE-ABS-KEY ( "thyroid cancer" ) ) AND PUBYEAR > 1989                                | 201 document results     |
| 13 | ( TITLE-ABS-KEY ( omics ) AND TITLE-ABS-KEY ( thyroid ) OR TITLE-ABS-KEY ( endocrine ) OR TITLE-ABS-KEY ( "thyroid cancer" ) ) AND PUBYEAR > 1989                                     | 114 document results     |
| 12 | ( TITLE-ABS-KEY ( omics ) AND TITLE-ABS-KEY ( thyroid ) OR TITLE-ABS-KEY ( endocrine ) AND TITLE-ABS-KEY ( "thyroid cancer" ) ) AND PUBYEAR > 1989                                    | 12 document results      |
| 11 | ( TITLE-ABS-KEY ( oncometabolomics ) AND TITLE-ABS-KEY ( thyroid ) ) AND PUBYEAR > 1989                                                                                               | 0 document results       |
| 10 | ( TITLE-ABS-KEY ( oncometabolomics ) OR TITLE-ABS-KEY ( thyroid ) ) AND PUBYEAR > 1989                                                                                                | 165,176 document results |
| 9  | ( TITLE-ABS-KEY ( oncometabolomics ) AND TITLE-ABS-KEY ( "thyroid cancer" ) OR TITLE-ABS-KEY ( thyroid ) ) AND PUBYEAR > 1989                                                         | 0 document results       |
| 8  | ( TITLE-ABS-KEY ( oncometabolomic ) AND TITLE-ABS-KEY ( "thyroid cancer" ) OR TITLE-ABS-KEY ( thyroid ) ) AND PUBYEAR > 1989                                                          | 0 document results       |
| 7  | ( TITLE-ABS-KEY ( oncometabolom ) AND TITLE-ABS-KEY ( "thyroid cancer" ) OR TITLE-ABS-KEY ( thyroid ) ) AND PUBYEAR > 1989                                                            | 0 document results       |
| 6  | ( TITLE-ABS-KEY ( oncometabolomic ) AND TITLE-ABS-KEY ( "thyroid cancer" ) OR TITLE-ABS-KEY ( thyroid ) ) AND PUBYEAR > 1989                                                          | 0 document results       |
| 5  | ( TITLE-ABS-KEY ( omics ) AND TITLE-ABS-KEY ( thyroid ) ) AND PUBYEAR > 1989                                                                                                          | 40 document results      |
| 4  | ( TITLE-ABS-KEY ( metabolome ) AND TITLE-ABS-KEY ( thyroid ) ) AND PUBYEAR > 1989                                                                                                     | 47 document results      |
| 3  | ( TITLE-ABS-KEY ( metabolome ) OR TITLE-ABS-KEY ( metabolites ) OR TITLE-ABS-KEY ( metabonome ) AND TITLE-ABS-KEY ( metabolomics ) AND TITLE-ABS-KEY ( thyroid ) ) AND PUBYEAR > 1989 | 55 document results      |
| 2  | ( TITLE-ABS-KEY ( oncometabolite ) AND TITLE-ABS-KEY ( thyroid ) ) AND PUBYEAR > 1989                                                                                                 | 2 document results       |
| 1  | ( TITLE-ABS-KEY ( oncometabolite ) AND TITLE-ABS-KEY ( thyroid ) ) AND PUBYEAR > 1989                                                                                                 | 2 document results       |

## Web of Science Search History

|         |                        |                                                                                                                                                                             |      |                          |                          |
|---------|------------------------|-----------------------------------------------------------------------------------------------------------------------------------------------------------------------------|------|--------------------------|--------------------------|
| #<br>25 | <a href="#">9</a>      | #24 AND #22<br><i>Indexes=SCI-EXPANDED, SSCI, CPCI-S, CPCI-SSH, ESCI Timespan=1990-2018</i>                                                                                 | Edit | <input type="checkbox"/> | <input type="checkbox"/> |
| #<br>24 | <a href="#">19,931</a> | TITLE: ("thyroid cancer") OR TITLE: ("thyroid carcinoma") OR TITLE: ("thyroid adenoma")<br><i>Indexes=SCI-EXPANDED, SSCI, CPCI-S, CPCI-SSH, ESCI Timespan=1990-2018</i>     | Edit | <input type="checkbox"/> | <input type="checkbox"/> |
| #<br>23 | <a href="#">123</a>    | #22 AND #17<br><i>Indexes=SCI-EXPANDED, SSCI, CPCI-S, CPCI-SSH, ESCI Timespan=1990-2018</i>                                                                                 | Edit | <input type="checkbox"/> | <input type="checkbox"/> |
| #<br>22 | <a href="#">58,071</a> | TITLE: (metabolome) OR TITLE: (metabolites) OR TITLE: (metabonome) OR TITLE: (metabolomics)<br><i>Indexes=SCI-EXPANDED, SSCI, CPCI-S, CPCI-SSH, ESCI Timespan=1990-2018</i> | Edit | <input type="checkbox"/> | <input type="checkbox"/> |
| #<br>21 | <a href="#">4</a>      | TITLE: (metabolom)<br><i>Indexes=SCI-EXPANDED, SSCI, CPCI-S, CPCI-SSH, ESCI Timespan=1990-2018</i>                                                                          | Edit | <input type="checkbox"/> | <input type="checkbox"/> |

|      |                        |                                                                                                                                                                                                     |                      |                                     |
|------|------------------------|-----------------------------------------------------------------------------------------------------------------------------------------------------------------------------------------------------|----------------------|-------------------------------------|
|      |                        |                                                                                                                                                                                                     |                      |                                     |
| # 20 | <a href="#">383</a>    | <b>TITLE:</b> (omic)<br><i>Indexes=SCI-EXPANDED, SSCI, CPCI-S, CPCI-SSH, ESCI Timespan=1990-2018</i>                                                                                                | <a href="#">Edit</a> | <input type="checkbox"/>            |
| # 19 | <a href="#">2,043</a>  | <b>TITLE:</b> (omics)<br><i>Indexes=SCI-EXPANDED, SSCI, CPCI-S, CPCI-SSH, ESCI Timespan=1990-2018</i>                                                                                               | <a href="#">Edit</a> | <input type="checkbox"/>            |
| # 18 | <a href="#">14</a>     | #17 AND #16<br><i>Indexes=SCI-EXPANDED, SSCI, CPCI-S, CPCI-SSH, ESCI Timespan=1990-2018</i>                                                                                                         | <a href="#">Edit</a> | <input type="checkbox"/>            |
| # 17 | <a href="#">67,268</a> | <b>TITLE:</b> (thyroid)<br><i>Indexes=SCI-EXPANDED, SSCI, CPCI-S, CPCI-SSH, ESCI Timespan=1990-2018</i>                                                                                             | <a href="#">Edit</a> | <input type="checkbox"/>            |
| # 16 | <a href="#">5,787</a>  | <b>TITLE:</b> (metabolomics)<br><i>Indexes=SCI-EXPANDED, SSCI, CPCI-S, CPCI-SSH, ESCI Timespan=1990-2018</i>                                                                                        | <a href="#">Edit</a> | <input type="checkbox"/>            |
| # 15 | <a href="#">9</a>      | #14 AND #13<br><i>Indexes=SCI-EXPANDED, SSCI, CPCI-S, CPCI-SSH, ESCI Timespan=1990-2018</i>                                                                                                         | <a href="#">Edit</a> | <input type="checkbox"/>            |
| # 14 | <a href="#">26,685</a> | <b>TITLE:</b> ("thyroid cancer") <b>OR TOPIC:</b> ("thyroid carcinoma")<br><i>Indexes=SCI-EXPANDED, SSCI, CPCI-S, CPCI-SSH, ESCI Timespan=1990-2018</i>                                             | <a href="#">Edit</a> | <input type="checkbox"/>            |
| # 13 | <a href="#">9,348</a>  | <b>TITLE:</b> (metabolomics) <b>OR TITLE:</b> (Omics) <b>OR TITLE:</b> (metabolome) <b>OR TITLE:</b> (metabome)<br><i>Indexes=SCI-EXPANDED, SSCI, CPCI-S, CPCI-SSH, ESCI Timespan=1990-2018</i>     | <a href="#">Edit</a> | <input type="checkbox"/>            |
| # 12 | <a href="#">468</a>    | #7 AND #1<br><i>Indexes=SCI-EXPANDED, SSCI, CPCI-S, CPCI-SSH, ESCI Timespan=1990-2018</i>                                                                                                           | <a href="#">Edit</a> | <input type="checkbox"/>            |
| # 11 | <a href="#">5,787</a>  | #10 AND #9<br><i>Indexes=SCI-EXPANDED, SSCI, CPCI-S, CPCI-SSH, ESCI Timespan=1990-2018</i>                                                                                                          | <a href="#">Edit</a> | <input type="checkbox"/>            |
| # 10 | <a href="#">5,787</a>  | <b>TITLE:</b> (metabolomics) <b>OR TITLE:</b> (Omics) <b>AND TITLE:</b> ("thyroid cancer")<br><i>Indexes=SCI-EXPANDED, SSCI, CPCI-S, CPCI-SSH, ESCI Timespan=1990-2018</i>                          | <a href="#">Edit</a> | <input type="checkbox"/>            |
| # 9  | <a href="#">5,787</a>  | <b>TITLE:</b> (metabolomics) <b>OR TITLE:</b> (Omics) <b>AND TITLE:</b> (thyroid)<br><i>Indexes=SCI-EXPANDED, SSCI, CPCI-S, CPCI-SSH, ESCI Timespan=1990-2018</i>                                   | <a href="#">Edit</a> | <input type="checkbox"/>            |
| # 8  | <a href="#">2,117</a>  | <b>TITLE:</b> (oncometabolite) <b>OR TITLE:</b> (omics) <b>OR TITLE:</b> (metabolomics) <b>AND TITLE:</b> (thyroid)<br><i>Indexes=SCI-EXPANDED, SSCI, CPCI-S, CPCI-SSH, ESCI Timespan=1990-2018</i> | <a href="#">Edit</a> | <input type="checkbox"/>            |
| # 7  | <a href="#">2,126</a>  | <b>TITLE:</b> (oncometabolite) <b>OR TITLE:</b> (omics) <b>OR TITLE:</b> (metabolomics) <b>AND TOPIC:</b> (thyroid)<br><i>Indexes=SCI-EXPANDED, SSCI, CPCI-S, CPCI-SSH, ESCI Timespan=1990-2018</i> | <a href="#">Edit</a> | <input type="checkbox"/>            |
| # 6  | <a href="#">49,101</a> | <b>TOPIC:</b> (oncometabolites) <b>OR TOPIC:</b> (thyroid cancer) <b>OR TOPIC:</b> (thyroid carcinoma)<br><i>Indexes=SCI-EXPANDED, SSCI, CPCI-S, CPCI-SSH, ESCI Timespan=1990-2018</i>              | <a href="#">Edit</a> | <input type="checkbox"/>            |
| # 5  | <a href="#">55,948</a> | <b>TOPIC:</b> (Omics) <b>OR TOPIC:</b> (thyroid cancer) <b>OR TOPIC:</b> (thyroid carcinoma)<br><i>Indexes=SCI-EXPANDED, SSCI, CPCI-S, CPCI-SSH, ESCI Timespan=1990-2018</i>                        | <a href="#">Edit</a> | <input checked="" type="checkbox"/> |
| # 4  | <a href="#">67,057</a> | <b>TOPIC:</b> (metabolomics) <b>OR TOPIC:</b> (thyroid cancer) <b>OR TOPIC:</b> (thyroid carcinoma)<br><i>Indexes=SCI-EXPANDED, SSCI, CPCI-S, CPCI-SSH, ESCI Timespan=1990-2018</i>                 | <a href="#">Edit</a> | <input type="checkbox"/>            |
| # 3  | <a href="#">67,066</a> | <b>TOPIC:</b> (metabolomics) <b>OR TOPIC:</b> (omics) <b>AND TOPIC:</b> (thyroid) <b>OR TOPIC:</b> (thyroid)<br><i>Indexes=SCI-EXPANDED, SSCI, CPCI-S, CPCI-SSH, ESCI Timespan=1990-2018</i>        | <a href="#">Edit</a> | <input type="checkbox"/>            |

|     |                        |                                                                                                                                                                                                |                      |                          |                          |
|-----|------------------------|------------------------------------------------------------------------------------------------------------------------------------------------------------------------------------------------|----------------------|--------------------------|--------------------------|
|     |                        | cancer) OR TOPIC: (thyroid carcinoma)<br><i>Indexes=SCI-EXPANDED, SSCI, CPCI-S, CPCI-SSH, ESCI Timespan=1990-2018</i>                                                                          |                      |                          |                          |
| # 2 | <a href="#">54,871</a> | TOPIC: (metabolomics) OR TOPIC: (metabonome) OR TOPIC: (omics) AND TOPIC: (thyroid) OR TOPIC: (thyroid cancer)<br><i>Indexes=SCI-EXPANDED, SSCI, CPCI-S, CPCI-SSH, ESCI Timespan=1990-2018</i> | <a href="#">Edit</a> | <input type="checkbox"/> | <input type="checkbox"/> |
| # 1 | <a href="#">20,983</a> | TOPIC: (metabolome) OR TOPIC: (metabolomics) OR TOPIC: (metabonome) OR TOPIC: (omics) AND TOPIC: (thyroid)<br><i>Indexes=SCI-EXPANDED, SSCI, CPCI-S, CPCI-SSH, ESCI Timespan=1990-2018</i>     |                      |                          |                          |

## EMBASE Search History

|                                                                                                |                        |     |
|------------------------------------------------------------------------------------------------|------------------------|-----|
| #16 AND #17                                                                                    | <a href="#">0</a>      | #17 |
| 'thyroid':ab,ti AND [2018-2018]/py                                                             | <a href="#">1,042</a>  | #16 |
| 'omic':ab,ti AND [2018-2018]/py                                                                | <a href="#">36</a>     | #15 |
| #1 AND #12                                                                                     | <a href="#">52</a>     | #14 |
| #4 AND #12                                                                                     | <a href="#">44</a>     | #13 |
| #1 AND #4 AND #12                                                                              | <a href="#">3</a>      | #12 |
| ('thyroid':ab,ti OR 'cancer':ab,ti OR 'adenoma':ab,ti OR 'carcinoma':ab,ti) AND [2018-2018]/py | <a href="#">21,273</a> | #11 |
| #1 AND #4 AND #7                                                                               | <a href="#">0</a>      | #10 |
| #1 AND #9                                                                                      | <a href="#">0</a>      | #9  |
| ('thyroid':ab,ti OR 'malignant neoplasm':ab,ti) AND [2018-2018]/py                             | <a href="#">1,069</a>  | #8  |
| #6 AND #7                                                                                      | <a href="#">5</a>      |     |

|                                                                                                                                                                                              |                        |
|----------------------------------------------------------------------------------------------------------------------------------------------------------------------------------------------|------------------------|
|                                                                                                                                                                                              | <b>#7</b>              |
| 'thyroid':ab,ti AND [2018-2018]/py                                                                                                                                                           |                        |
|                                                                                                                                                                                              | <a href="#">1,042</a>  |
|                                                                                                                                                                                              | <b>#6</b>              |
| ('omics':ab,ti OR 'oncometabolite':ab,ti OR 'metabolomics':ab,ti OR 'metabolome':ab,ti OR 'metabolite':ab,ti OR 'metabonomics':ab,ti OR 'metabonomic'/exp OR metabonomic) AND [2018-2018]/py |                        |
|                                                                                                                                                                                              | <a href="#">1,461</a>  |
| #2 AND #4                                                                                                                                                                                    |                        |
|                                                                                                                                                                                              | <a href="#">0</a>      |
|                                                                                                                                                                                              | <b>#4</b>              |
| 'omics':ab,ti AND [2018-2018]/py                                                                                                                                                             |                        |
|                                                                                                                                                                                              | <a href="#">196</a>    |
|                                                                                                                                                                                              | <b>#3</b>              |
| #1 AND #2                                                                                                                                                                                    |                        |
|                                                                                                                                                                                              | <a href="#">19</a>     |
|                                                                                                                                                                                              | <b>#2</b>              |
| ('thyroid disease':ab,ti OR 'thyroid cancer':ab,ti OR 'thyroid carcinoma':ab,ti OR 'thyroid adenoma':ab,ti) AND [1990-2018]/py                                                               |                        |
|                                                                                                                                                                                              | <a href="#">46,841</a> |
|                                                                                                                                                                                              | <b>#1</b>              |
| ('metabolomics':ab,ti OR 'metabolome':ab,ti OR 'metabonomics':ab,ti OR 'metabonomic':ab,ti) AND [1990-2018]/py                                                                               |                        |
|                                                                                                                                                                                              | <a href="#">19,180</a> |
|                                                                                                                                                                                              |                        |
|                                                                                                                                                                                              |                        |
